# Supplementary material
Source: PubMed Central journal article supplement (PMC4050975)
Supplement: NIHMS581495-supplement-1.pdf [file NIHMS581495-supplement-1.pdf]

## **SUPPLEMENTARY INFORMATION**

### **Rare and low-frequency coding variants in *CXCR2* and other genes are associated with hematological traits**

Paul L. Auer, Alexander Teumer, Ursula Schick, Andrew O'Shaughnessy, Ken Sin Lo, Nathalie Chami, Chris Carlson, Simon de Denus, Marie-Pierre Dubé, Jeff Haessler, Rebecca D. Jackson, Charles Kooperberg, Louis-Philippe Lemieux Perreault, Matthias Nauck, Ulrike Peters, John D. Rioux, Frank Schmidt, Valérie Turcot, Uwe Völker, Henry Völzke, Andreas Greinacher, Li Hsu, Jean-Claude Tardif, George A. Diaz, Alexander P. Reiner, Guillaume Lettre

**Supplementary Figures 1-9**

**Supplementary Tables 1-7**

**Supplementary Note**

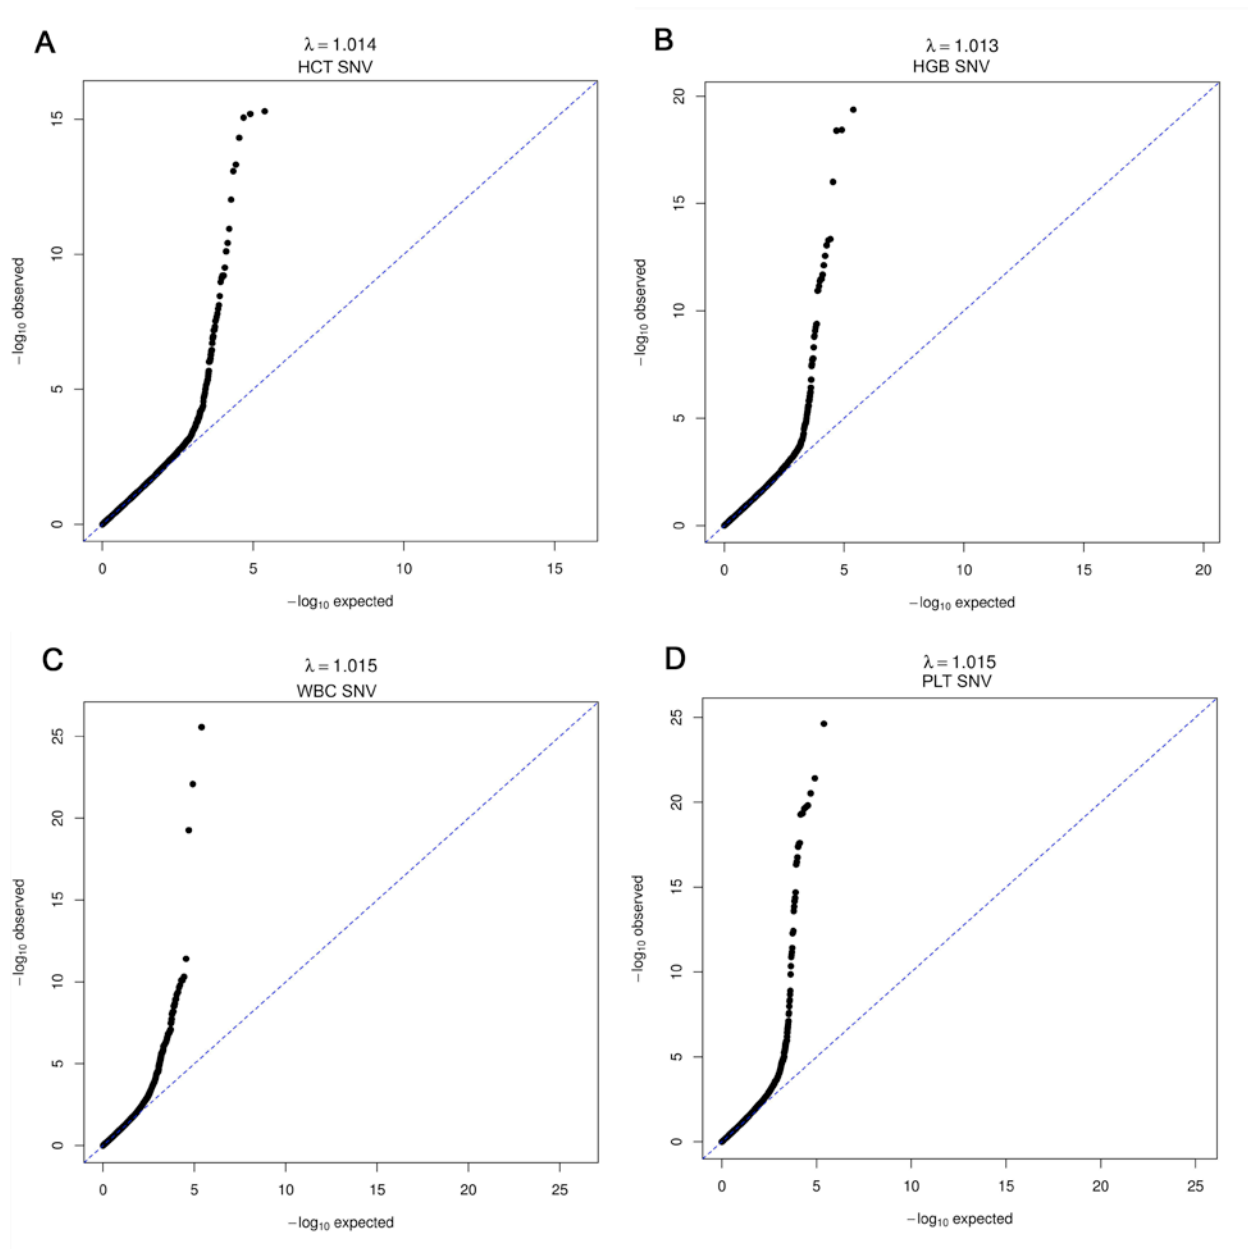

**Supplementary Figure 1.** Quantile-quantile plots of single variant association results. (A) Hematocrit. (B) Hemoglobin. (C) White blood cell count. (D) platelet count.

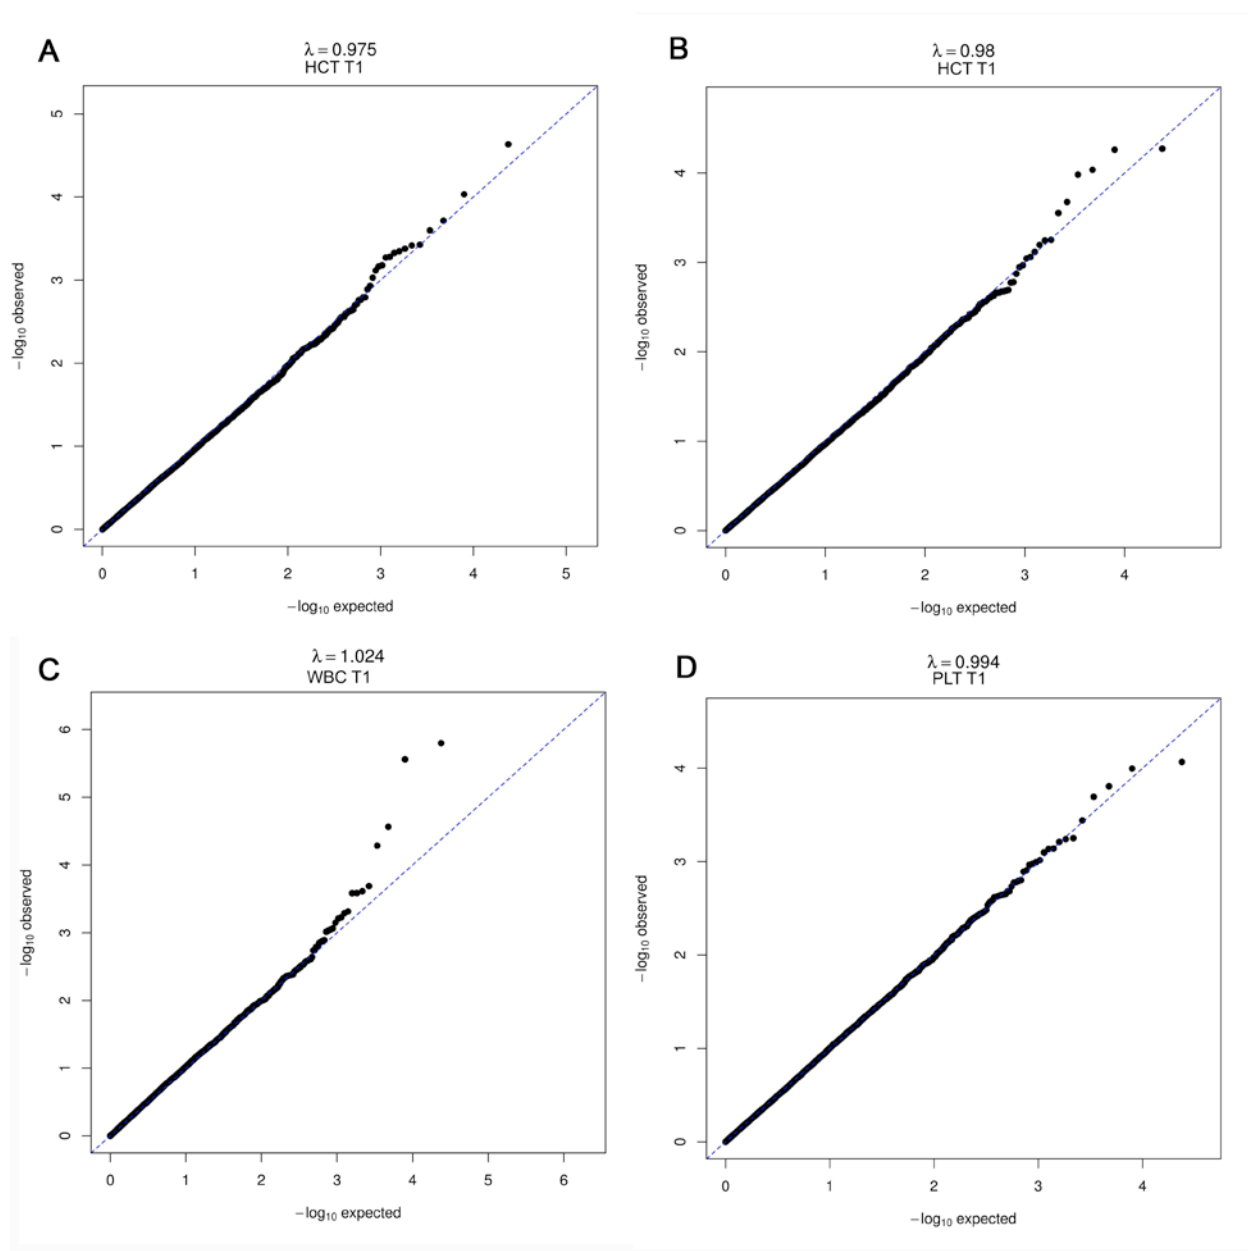

**Supplementary Figure 2.** Quantile-quantile plots of gene-based burden T1 results. (A) Hematocrit. (B) Hemoglobin. (C) White blood cell count. (D) Platelet count. For each gene, we only considered missense, nonsense and splice site variants with a minor allele frequency <1%.

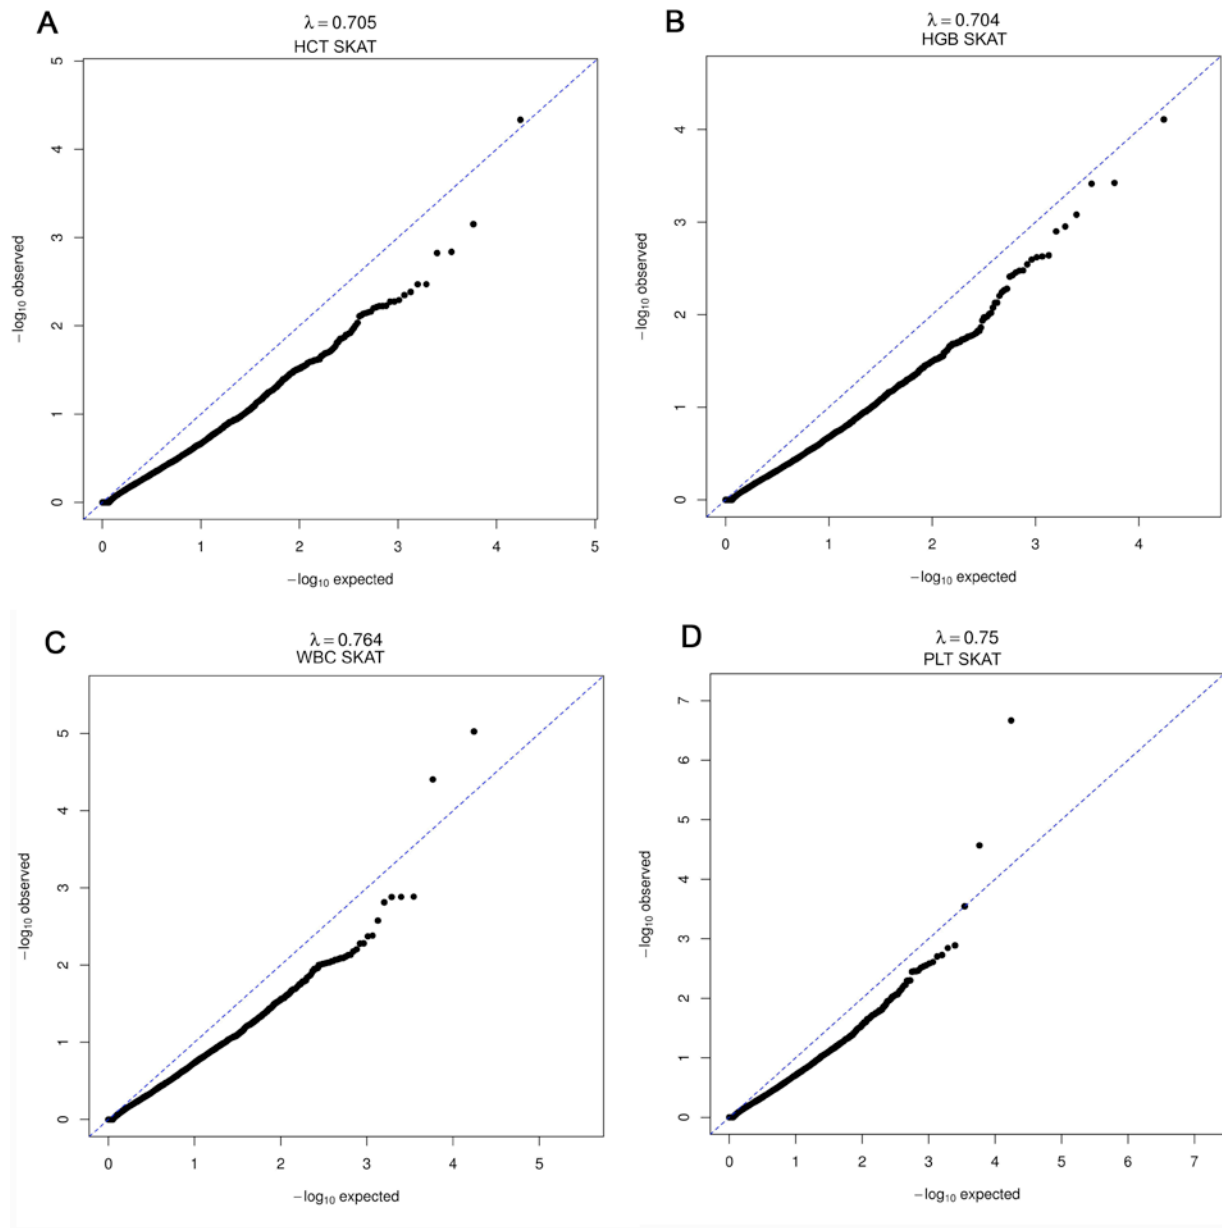

**Supplementary Figure 3.** Quantile-quantile plots of gene-based SKAT results. (A) Hematocrit. (B) Hemoglobin. (C) White blood cell count. (D) Platelet count. For each gene, we only considered missense, nonsense and splice site variants with a minor allele frequency <5%.

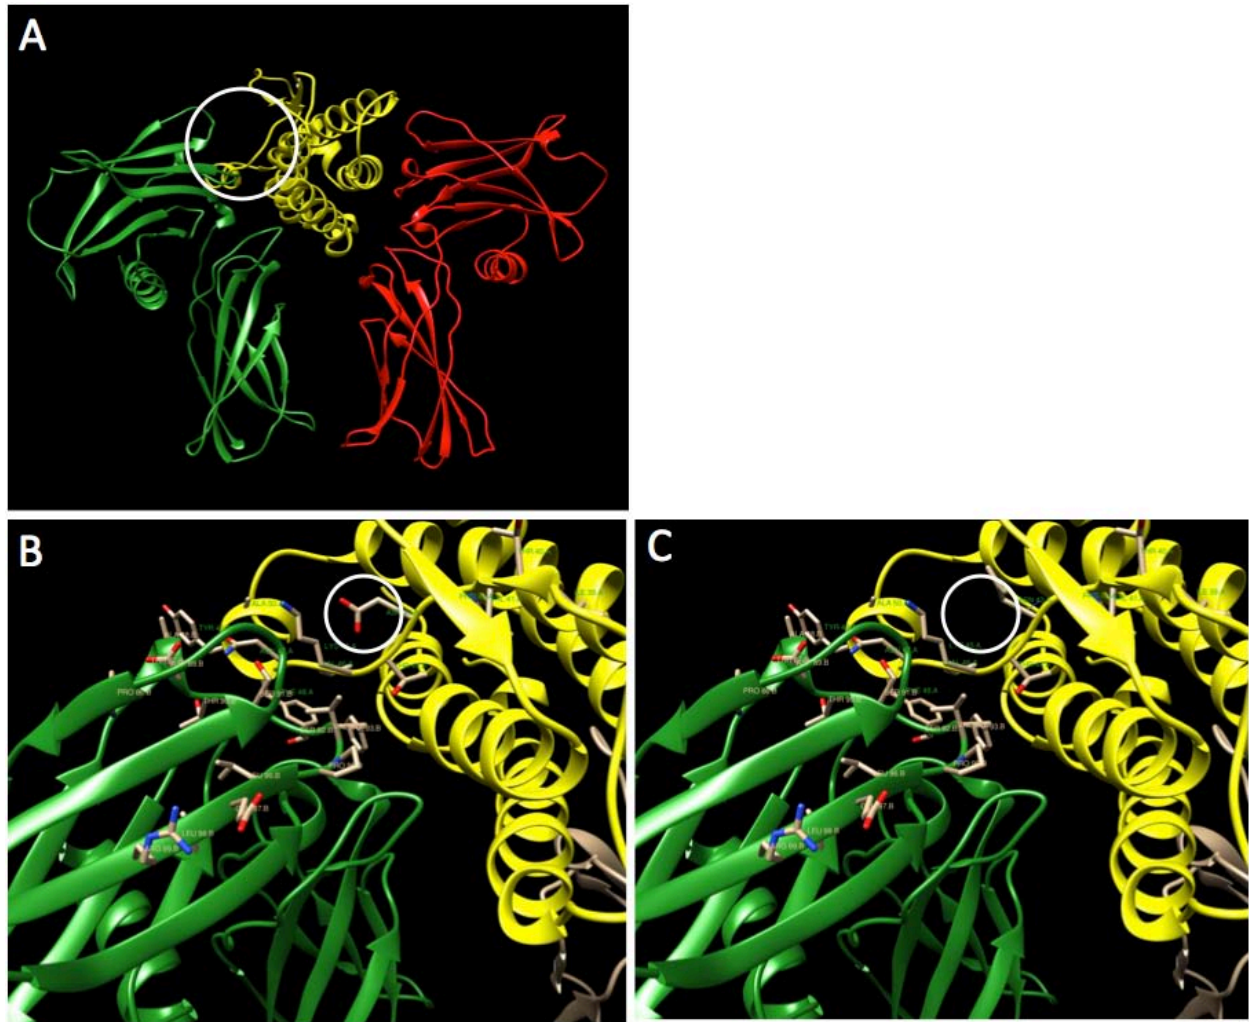

**Supplementary Figure 4.** Impact of mutation p.Asp70Asn in *EPO*. (A) Crystal structure of erythropoietin (EPO, yellow) with two erythropoietin receptor subunits (EPOR, green and red)<sup>1</sup>. The white circle indicates the interface between EPO and EPOR magnified in (B) and (C). In (B) and (C), the white circles highlight residue 70 (43 after cleavage of the propeptide). Replacing Asp70 (B) by Asn70 (C) may de-stabilize the EPO loop that interacts with EPOR because it disrupts a hydrogen bond between Asp70 and Thr71.

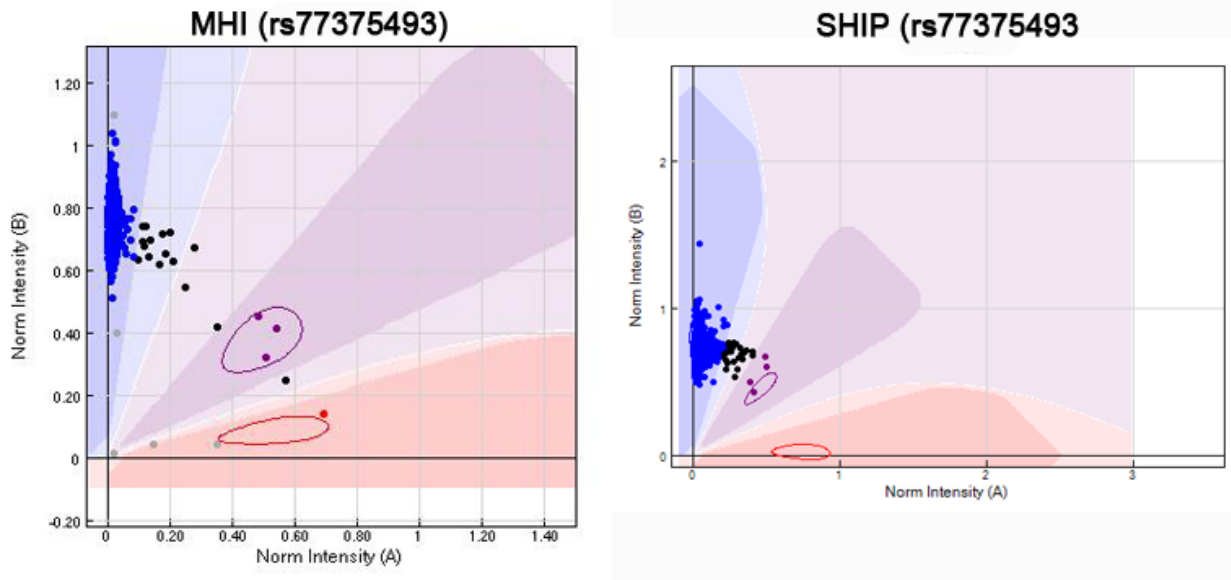

**Supplementary Figure 5.** Intensity plots for *JAK2* p.Val617Phe in the Montreal Heart Institute (MHI; left) and the Study of Health in Pomerania (SHIP; right) genotyped on the Illumina HumanExome Beadchip. Density plots for the Women’s Health Initiative were not available.

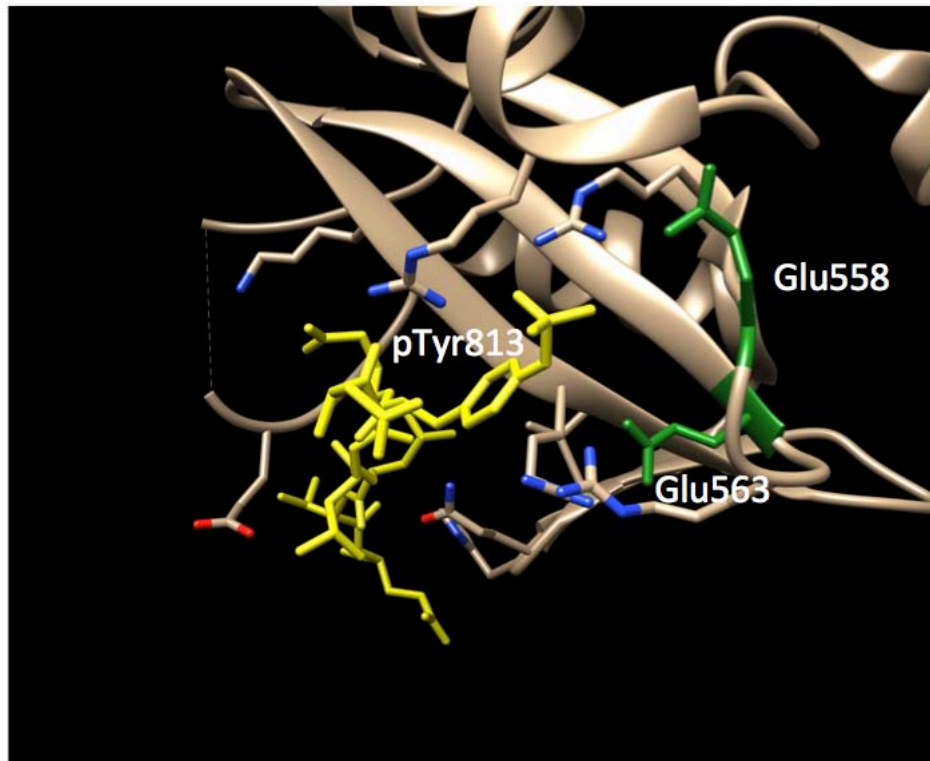

**Supplementary Figure 6.** Mutations in *SH2B3* may interfere with JAK2 binding. Crystal structure of the SH2-B SH2 domain (beige) with JAK2 phospho-tyrosine peptide (pTyr813, yellow)<sup>2</sup>. JAK2 pTyr813 interacts with arginine residues in the SH2-B BC loop. The glutamate residues identified in our association study (Glu395 and Glu400, green) correspond to Glu558 and Glu563 in the SH2-B sequence. They are directly in the BC loop that interacts with JAK2. Glu563 interacts with Arg578.

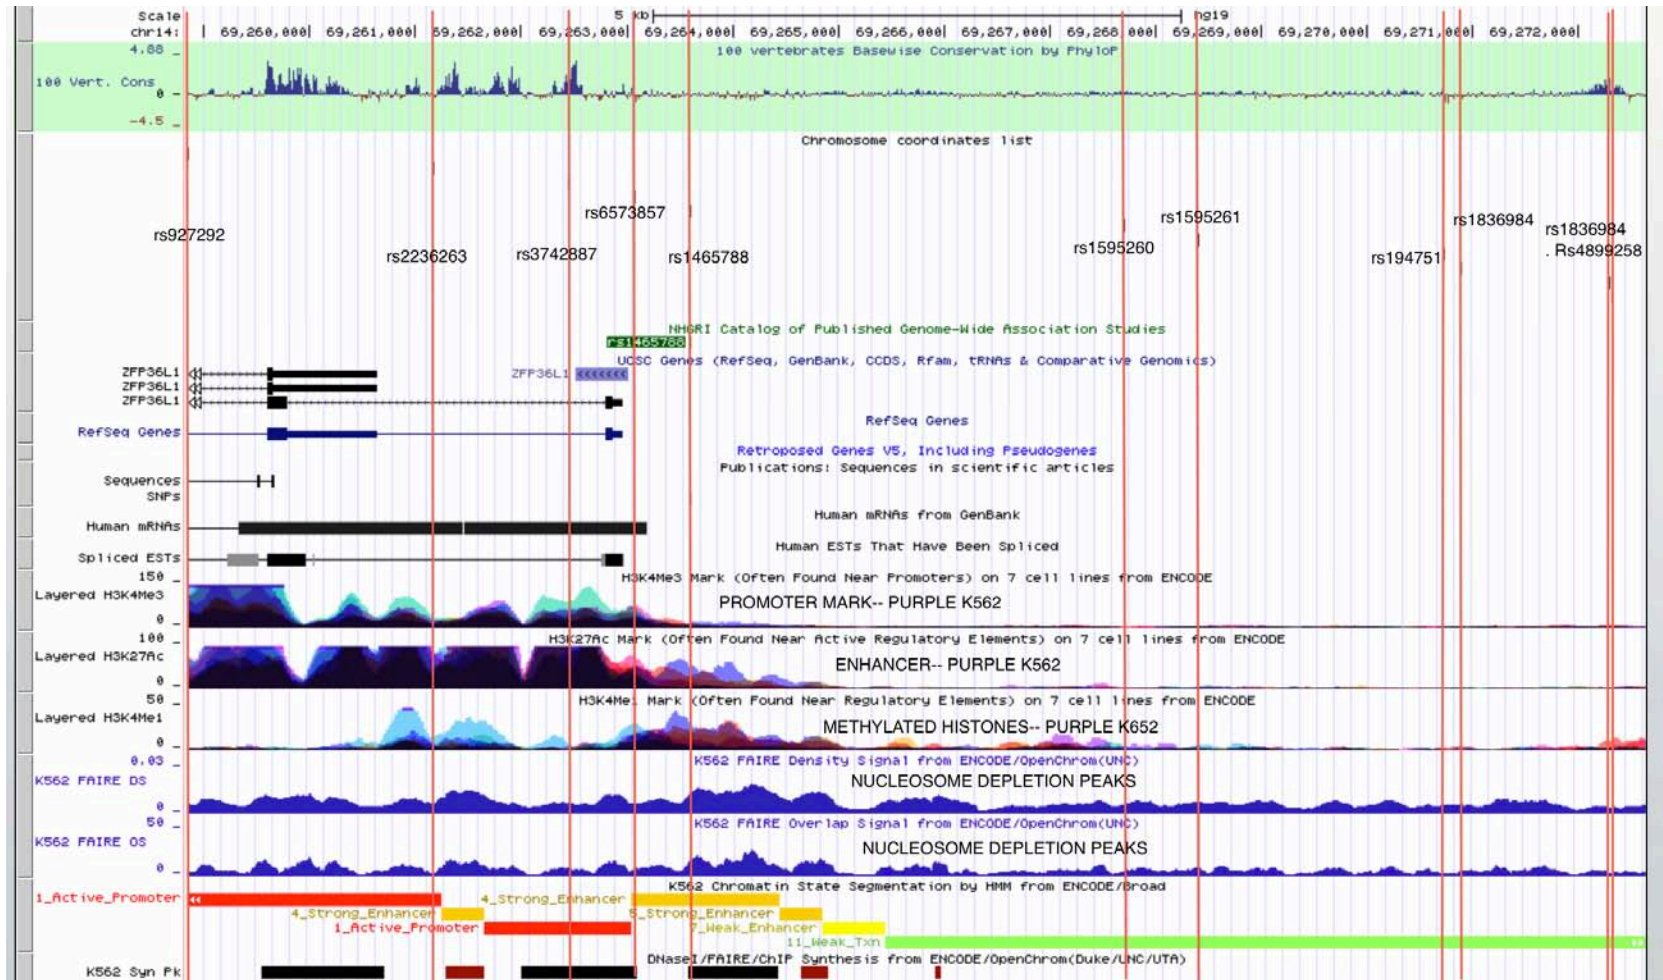

**Supplementary Figure 7.** UCSC ENCODE tracks for the rs1465788 variant near *ZFP36L1*. The rs1465788 variant appears to be in a K562 FAIRE nucleosome depletion peak. The rs1465788 is also in high LD with rs2236263 ( $r^2=0.91$  in CEU), rs3742887 ( $r^2=0.99$  in CEU), and rs6573857 ( $r^2=1$  in CEU) which all lie in an active promoter for *ZFP36L1*.



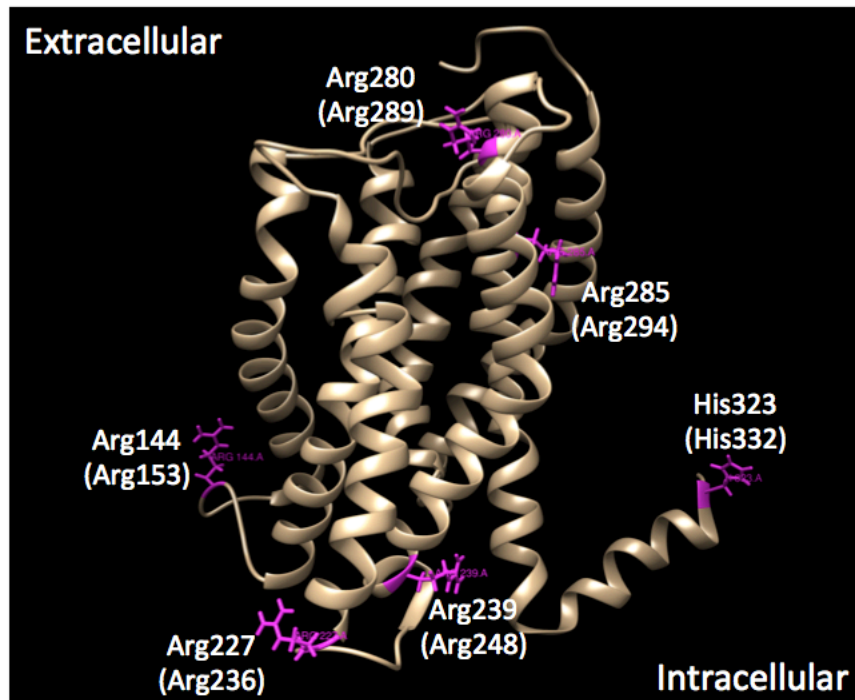

**Supplementary Figure 8.** Crystal structure of CXCR1 in a phospholipid bilayer<sup>3</sup>. CXCR2, like CXCR1 and CXCR4, is a seven transmembrane (TM) domains protein. In purple are the CXCR1 residues that correspond to the missense mutations identified in CXCR2 (two CXCR2 residues, Met6 and Ala37, do not have their CXCR1 equivalent on this structure). In parenthesis are the corresponding CXCR2 residues. CXCR2 Arg289 and Arg294 are in TM domains. The remaining four CXCR2 residues (Arg144, Arg236, Arg248, His332) are in intracellular loops.

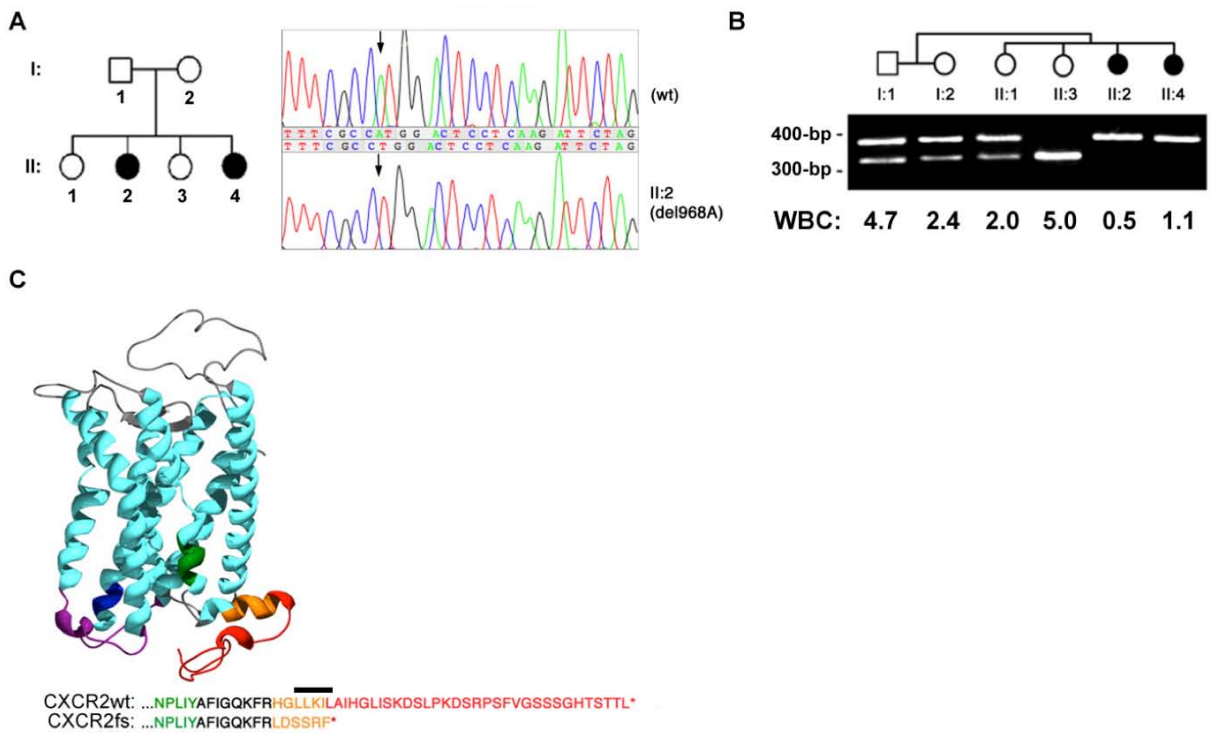

**Supplementary Figure 9.** Analysis of CXCR2 in Myelokathexis Pedigree. (A) A myelokathexis pedigree with two affected (filled) and two unaffected (open) daughters is shown at left. *CXCR2* sequence trace shows a single base deletion corresponding to coding sequence position 968 in individual I-2 (unaffected) compared to an unrelated control (arrow). (B) An *NcoI* recognition site (CCATGG) which gives a 325-bp fragment when a wild type amplicon is digested is destroyed by the 968delA mutation so that the 375-bp undigested amplicon persists. Affected siblings II-2 and II-4 are homozygous for the deletion mutation, parents and sibling II-1 are heterozygous for the mutation, and sibling II-3 is homozygous for the wild type allele. White blood cell counts (WBC) for each family member are shown below. (C) A structural model of CXCR2 with the conserved GPCR motifs (intracellular loop 2 - purple, DRY - dark blue, NPXXY - green), the mutant frameshift peptide (orange), and the truncated wild type tail (red) indicated. The frameshift is located in Helix 8, which is predicted to be parallel to the plasma membrane. The amino acid sequences from the wild type and mutant CXCR2 constructs are shown. The CXCR2fs construct contain a six-amino acid frameshift peptide (LDSSRF). Amino acid colors correspond to those used in the structure model. The black bar over the primary sequence indicates the location of a highly conserved LLKIL dileucine motif that is critical for receptor-mediated chemotaxis<sup>4</sup>.

**Supplementary Table 1.** Description of the three cohorts analyzed in this study. Summary statistics of the hematological traits and other covariates measured in each study. Values are presented as mean (standard deviation).

|                                                                    | <b>Montreal Heart Institute (MHI) Biobank</b> | <b>Women Health Initiative (WHI)</b> | <b>Study of Health in Pomerania (SHIP/SHIP-TREND)</b> |
|--------------------------------------------------------------------|-----------------------------------------------|--------------------------------------|-------------------------------------------------------|
| <b>Number of individuals with phenotype and genotype available</b> | 6,796                                         | 18,072                               | 6,526                                                 |
| <b>Percent women</b>                                               | 37                                            | 100                                  | 51                                                    |
| <b>Age (years)</b>                                                 | 63 (11)                                       | 66 (7)                               | 53 (15)                                               |
| <b>Hemoglobin (g/dl)</b>                                           | 13.8 (1.7)                                    | 13.6 (0.9)                           | 14.0 (1.3)                                            |
| <b>Hematocrit (%)</b>                                              | 40.6 (4.9)                                    | 40.4 (2.9)                           | 41.6 (3.4)                                            |
| <b>White blood cell (x10<sup>9</sup>/l)</b>                        | 7.1 (2.2)                                     | 6.1 (1.6)                            | 6.4 (1.8)                                             |
| <b>Platelet (x10<sup>9</sup>/l)</b>                                | 228.6 (67.1)                                  | 245.9 (55.8)                         | 225.4 (53.5)                                          |

**Supplementary Table 2.** Single variant replication results. The direction of the effect sizes (Beta) is for the A1 allele. Effect sizes and standard errors (SE) are in the following units: for hematocrit (%), for hemoglobin (g/dl), for white blood cell count ( $\log_{10}(x10^9/l)$ ) and platelet count ( $x10^9/l$ ). n.d.; not determined because the marker is monomorphic in SHIP.

| Variant                 | Chr (Pos)     | A1/A2 | Discovery MHI+WHI (N=24,814) |                |                      | Replication SHIP (N=6,526) |                 |        | Combined (N=31,340) |                      |                      | Gene           | Annotation                                    |
|-------------------------|---------------|-------|------------------------------|----------------|----------------------|----------------------------|-----------------|--------|---------------------|----------------------|----------------------|----------------|-----------------------------------------------|
|                         |               |       | Freq (A1)                    | Beta (SE)      | P                    | Freq (A1)                  | Beta (SE)       | P      | Beta (SE)           | P                    | Hetero. P            |                |                                               |
| <b>HEMATOCRIT</b>       |               |       |                              |                |                      |                            |                 |        |                     |                      |                      |                |                                               |
| rs146600269             | 1:89,486,344  | T/G   | 0.0005                       | -3.125 (0.696) | $7.2 \times 10^{-6}$ | 0.0011                     | -0.213 (0.854)  | 0.80   | -1.962 (0.54)       | $2.8 \times 10^{-4}$ | 0.0082               | <i>GBP3</i>    | Missense (p.L21M)                             |
| rs61755431              | 1:155,260,382 | T/C   | 0.0025                       | -1.228 (0.301) | $4.4 \times 10^{-5}$ | 0.0025                     | -0.719 (0.506)  | 0.16   | -1.095 (0.259)      | $2.3 \times 10^{-5}$ | 0.39                 | <i>PKLR</i>    | Missense (p.R538Q, p.R569Q)                   |
| rs200879349             | 1:169,438,042 | T/G   | 0.9999                       | 14.83 (3.269)  | $5.7 \times 10^{-6}$ | 0.9999                     | 0.989 (2.05)    | 0.63   | 4.895 (1.737)       | 0.0048               | $3.3 \times 10^{-4}$ | <i>SLC19A2</i> | Missense (p.K355Q)                            |
| rs17319721              | 4:77,368,847  | A/G   | 0.43                         | 0.151 (0.028)  | $1.1 \times 10^{-7}$ | 0.45                       | 0.047 (0.051)   | 0.35   | 0.126 (0.025)       | $3.5 \times 10^{-7}$ | 0.074                | <i>SHROOM3</i> | Intronic                                      |
| rs201657731             | 7:80,302,104  | T/C   | 0.0002                       | 5.139 (1.164)  | $1.0 \times 10^{-5}$ | 0.0005                     | -0.062 (1.186)  | 0.96   | 2.588 (0.831)       | 0.0018               | 0.0018               | <i>CD36</i>    | Nonsense (Q382X)                              |
| rs62483572              | 7:100,319,633 | A/G   | 0.0045                       | -1.072 (0.211) | $3.5 \times 10^{-7}$ | 0.0041                     | -1.105 (0.396)  | 0.0053 | -1.079 (0.186)      | $6.4 \times 10^{-9}$ | 0.94                 | <i>EPO</i>     | Missense (p.D70N)                             |
| rs77375493              | 9:5,073,770   | T/G   | 0.0004                       | 3.714 (0.758)  | $9.5 \times 10^{-7}$ | 0.0041                     | -0.116 (0.495)  | 0.81   | 1.03 (0.415)        | 0.013                | $2.3 \times 10^{-5}$ | <i>JAK2</i>    | Missense (p.V617F)                            |
| rs33971440              | 11:5,248,159  | T/C   | 0.0002                       | -5.723 (1.291) | $9.2 \times 10^{-6}$ | Monomorphic                |                 |        | n.d.                |                      |                      | <i>HBB</i>     | 5' splice site (exon2:c.92+1G>A)              |
| rs2270416               | 16:89,261,482 | A/C   | 0.035                        | 0.345 (0.077)  | $7.0 \times 10^{-6}$ | 0.032                      | 0.14 (0.143)    | 0.33   | 0.299 (0.068)       | $9.6 \times 10^{-6}$ | 0.21                 | <i>CDH15</i>   | Nonsense (Y788X)                              |
| <b>HEMOGLOBIN</b>       |               |       |                              |                |                      |                            |                 |        |                     |                      |                      |                |                                               |
| rs61755431              | 1:155,260,382 | T/C   | 0.0025                       | -0.434 (0.102) | $1.9 \times 10^{-5}$ | 0.0025                     | -0.417 (0.179)  | 0.020  | -0.43 (0.088)       | $1.1 \times 10^{-6}$ | 0.93                 | <i>PKLR</i>    | Missense (p.R538Q, p.R569Q)                   |
| rs200879349             | 1:169,438,042 | T/G   | 0.9999                       | 5.144 (1.134)  | $5.7 \times 10^{-6}$ | 0.9999                     | 0.397 (0.723)   | 0.58   | 1.77 (0.61)         | 0.0037               | $4.2 \times 10^{-4}$ | <i>SLC19A2</i> | Missense (p.K355Q)                            |
| rs28664715              | 4:87,809,025  | T/C   | 0.91                         | -0.077 (0.016) | $2.6 \times 10^{-6}$ | 0.92                       | -0.03 (0.033)   | 0.36   | -0.068 (0.015)      | $4.1 \times 10^{-6}$ | 0.20                 | <i>C4orf36</i> | Missense (p.Y81C)                             |
| rs139178017             | 7:100,225,847 | T/C   | 0.0042                       | 0.31 (0.075)   | $3.2 \times 10^{-5}$ | 0.0025                     | 0.385 (0.181)   | 0.033  | 0.321 (0.069)       | $3.3 \times 10^{-6}$ | 0.70                 | <i>TRF2</i>    | Synonymous (p.E491E) and 5' donor splice site |
| rs62483572              | 7:100,319,633 | A/G   | 0.0045                       | -0.347 (0.071) | $9.5 \times 10^{-7}$ | 0.0041                     | -0.354 (0.14)   | 0.011  | -0.348 (0.063)      | $3.4 \times 10^{-8}$ | 0.96                 | <i>EPO</i>     | Missense (p.D70N)                             |
| rs33971440              | 11:5,248,159  | T/C   | 0.0002                       | -2.41 (0.438)  | $3.7 \times 10^{-8}$ | Monomorphic                |                 |        | n.d.                |                      |                      | <i>HBB</i>     | 5' splice site (exon2:c.92+1G>A)              |
| <b>WHITE BLOOD CELL</b> |               |       |                              |                |                      |                            |                 |        |                     |                      |                      |                |                                               |
| rs1260326               | 2:27,730,940  | T/C   | 0.43                         | 0.005 (0.001)  | $3.8 \times 10^{-6}$ | 0.40                       | 0.005 (0.002)   | 0.017  | 0.005 (0.001)       | $8.5 \times 10^{-8}$ | 0.97                 | <i>GCKR</i>    | Missense (p.L446P)                            |
| <b>PLATELETS</b>        |               |       |                              |                |                      |                            |                 |        |                     |                      |                      |                |                                               |
| rs150282282             | 1:1,226,312   | T/C   | 0.0001                       | 286.8 (62.538) | $4.5 \times 10^{-6}$ | 0.0005                     | -18.06 (19.154) | 0.35   | 8.084 (18.314)      | 0.66                 | $3.2 \times 10^{-6}$ | <i>SCNN1D</i>  | Missense (p.P652L)                            |
| rs144362185             | 1:62,579,918  | A/G   | 0.0001                       | 282.9 (62.464) | $5.9 \times 10^{-6}$ | 0.0002                     | -31.3 (35.67)   | 0.38   | 45.962 (30.975)     | 0.14                 | $1.3 \times 10^{-5}$ | <i>INADL</i>   | Missense (p.R1552Q)                           |
|                         |               | C/G   | 0.88                         | -3.878 (0.801) | $1.3 \times 10^{-6}$ | 0.84                       | -2.446 (1.216)  | 0.044  | -3.444 (0.669)      | $2.6 \times 10^{-7}$ | 0.33                 | <i>PPARG</i>   | Missense (p.P12A)                             |
| rs149507188             | 3:99,513,493  | A/G   | 0.0001                       | 124.5 (24.874) | $5.6 \times 10^{-7}$ | Monomorphic                |                 |        | n.d.                |                      |                      | <i>COL8A1</i>  | Missense (p.A250T)                            |

|             |                    |     |        |                     |                       |             |                    |                      |                     |                       |                       |                 |                                |
|-------------|--------------------|-----|--------|---------------------|-----------------------|-------------|--------------------|----------------------|---------------------|-----------------------|-----------------------|-----------------|--------------------------------|
| rs149618433 | 4:3,318,625        | T/C | 0.0006 | 101.3<br>(22.103)   | 4.6x10 <sup>-6</sup>  | 0.0001      | -35.26<br>(50.472) | 0.48                 | 79.325<br>(20.247)  | 8.9x10 <sup>-5</sup>  | 0.013                 | <i>RGS12</i>    | Missense<br>(p.T243M)          |
| rs202125938 | 6:151,917,687      | A/G | 0.9999 | -295.1<br>(62.482)  | 2.3x10 <sup>-6</sup>  | 0.9999      | 36.37<br>(50.423)  | 0.47                 | -94.362<br>(39.239) | 0.016                 | 3.7x10 <sup>-6</sup>  | <i>C6orf97</i>  | Missense<br>(p.K562R)          |
| rs201367949 | 8:124,796,805      | A/C | 0.9999 | -278<br>(62.472)    | 8.6x10 <sup>-6</sup>  | Monomorphic |                    |                      | n.d.                |                       |                       | <i>FAM91A1</i>  | Missense<br>(p.N267H)          |
| rs77375493  | 9:5,073,770        | T/G | 0.0005 | 124.092<br>(12.827) | 3.9x10 <sup>-22</sup> | 0.0041      | 16.41<br>(8.61)    | 0.057                | 49.857<br>(7.149)   | 3.1x10 <sup>-12</sup> | 3.2x10 <sup>-12</sup> | <i>JAK2</i>     | Missense (p.V617F)             |
| rs146836226 | 11:8,947,080       | C/G | 0.9999 | -286.8<br>(62.538)  | 4.5x10 <sup>-6</sup>  | 0.9999      | 57.22<br>(50.459)  | 0.26                 | -78.429<br>(39.27)  | 0.046                 | 1.9x10 <sup>-5</sup>  | <i>C11orf16</i> | Missense<br>(p.Q378H)          |
| rs3888798   | 11:88,027,209      | T/C | 0.96   | -5.623<br>(1.341)   | 2.7x10 <sup>-5</sup>  | 0.95        | -4.122<br>(1.946)  | 0.034                | -5.14<br>(1.104)    | 3.2x10 <sup>-6</sup>  | 0.53                  | <i>CTSC</i>     | Missense (p.I453V)             |
| rs72650673  | 12:<br>111,885,310 | A/G | 0.0014 | 37.261<br>(6.724)   | 3.0x10 <sup>-8</sup>  | 0.0007      | 7.727<br>(18.254)  | 0.67                 | 33.732<br>(6.310)   | 9.0x10 <sup>-8</sup>  | 0.13                  | <i>SH2B3</i>    | Missense<br>(p.E400K)          |
| rs41300592  | 13:25,459,805      | T/C | 0.9998 | -118<br>(22.68)     | 2.0x10 <sup>-7</sup>  | 0.9998      | -40.94<br>(29.139) | 0.16                 | -88.928<br>(17.897) | 6.7x10 <sup>-7</sup>  | 0.037                 | <i>CENPJ</i>    | Missense<br>(p.N1102S)         |
| rs1465788   | 14:69,263,599      | T/C | 0.27   | -2.745<br>(0.578)   | 2.1x10 <sup>-6</sup>  | 0.27        | -3.063<br>(1.011)  | 0.0024               | -2.823<br>(0.502)   | 1.9x10 <sup>-8</sup>  | 0.78                  | <i>ZFP36L1</i>  | Intergenic                     |
| rs139734678 | 14:74,969,470      | T/C | 0.0001 | 278<br>(62.472)     | 8.6x10 <sup>-6</sup>  | 0.0002      | 4.954<br>(29.124)  | 0.87                 | 53.702<br>(26.397)  | 0.042                 | 7.5x10 <sup>-5</sup>  | <i>LTBP2</i>    | Missense<br>(p.V1686I)         |
| rs148159407 | 15:40,477,419      | A/G | 0.9995 | -64.166<br>(15.371) | 3.0x10 <sup>-5</sup>  | 0.9998      | 15.46<br>(35.704)  | 0.67                 | -51.716<br>(14.118) | 2.5x10 <sup>-4</sup>  | 0.041                 | <i>BUB1B</i>    | Missense<br>(p.N269D)          |
| rs150934316 | 16:1,555,571       | A/G | 0.0001 | 282.1<br>(62.495)   | 6.4x10 <sup>-6</sup>  | Monomorphic |                    |                      | n.d.                |                       |                       | <i>TELO2</i>    | Missense<br>(p.R668Q)          |
| rs76931703  | 19:43,237,080      | T/C | 0.9999 | -120.2<br>(24.862)  | 1.3x10 <sup>-6</sup>  | 0.9998      | -40.14<br>(35.68)  | 0.26                 | -94.032<br>(20.399) | 4.0x10 <sup>-6</sup>  | 0.066                 | <i>PSG3</i>     | Missense<br>(p.M189V)          |
| rs41303899  | 20:57,598,808      | A/G | 0.0016 | -27.696<br>(6.717)  | 3.7x10 <sup>-5</sup>  | 0.0024      | -42.63<br>(9.07)   | 2.7x10 <sup>-6</sup> | -32.986<br>(5.398)  | 9.9x10 <sup>-10</sup> | 0.19                  | <i>TUBB1</i>    | Missense<br>(p.G109E)          |
| rs73393075  | 22:29,537,940      | A/G | 0.0001 | 116.199<br>(25.406) | 4.8x10 <sup>-6</sup>  | 0.0002      | -23.08<br>(29.123) | 0.43                 | 56.01<br>(19.145)   | 0.0034                | 3.1x10 <sup>-4</sup>  | <i>KREMEN1</i>  | Missense (p.R406H,<br>p.R423H) |
| rs738409    | 22:44,324,727      | C/G | 0.77   | 2.941<br>(0.612)    | 1.6x10 <sup>-6</sup>  | 0.78        | 0.755<br>(1.065)   | 0.48                 | 2.398<br>(0.531)    | 6.3x10 <sup>-6</sup>  | 0.075                 | <i>PNPLA3</i>   | Missense (p.I148M)             |

**Supplementary Table 3.** Association results with blood cell phenotypes for SNPs previously identified by genome-wide association studies (GWAS). We only report results from the meta-analysis MHI+WHI (N=24,814) for SNPs present on the Illumina ExomeChip array (or proxies in linkage disequilibrium based on data from the 1000 Genomes Project's European populations). We obtained the list of associated SNPs from the largest meta-analyses published to date: hemoglobin and hematocrit levels<sup>5</sup>, white blood cell count<sup>6</sup> and platelet count<sup>7</sup>. Effect sizes and standard errors (SE) are in the following units: for hematocrit (%), for hemoglobin (g/dl), for white blood cell count (log<sub>10</sub>(x10<sup>9</sup>/l)) and platelet count (x10<sup>9</sup>/l).

| GWAS SNP          | CHR | BP        | ExomeChip SNP | CHR | BP        | r <sup>2</sup> with GWAS SNP | Allele1 | Allele2 | Freq (Allele 1) | BETA    | SE     | P-value   | Locus            |
|-------------------|-----|-----------|---------------|-----|-----------|------------------------------|---------|---------|-----------------|---------|--------|-----------|------------------|
| <b>HEMATOCRIT</b> |     |           |               |     |           |                              |         |         |                 |         |        |           |                  |
| rs857684          | 1   | 158575729 | rs863362      | 1   | 158549492 | 0.36                         | t       | c       | 0.4657          | 0.0735  | 0.028  | 0.008771  | <i>OR10X1</i>    |
| rs4953318         | 2   | 46355051  | rs10495928    | 2   | 46353166  | 0.8                          | a       | g       | 0.6602          | 0.2235  | 0.0296 | 4.79E-14  | <i>PRKCE</i>     |
| rs218238          | 4   | 55395024  | rs218237      | 4   | 55394172  | 0.53                         | t       | c       | 0.1296          | -0.19   | 0.0419 | 5.67E-06  |                  |
| rs13152701        | 4   | 122751061 | rs1507995     | 4   | 122748308 | 0.31                         | a       | g       | 0.2911          | 0.2149  | 0.0863 | 0.01281   | <i>BBS7</i>      |
| rs1408272         | 6   | 25842951  | rs1408272     | 6   | 25842951  | 1                            | t       | g       | 0.9364          | -0.2949 | 0.0582 | 4.02E-07  | <i>HFE</i>       |
| rs9349204         | 6   | 41914378  | rs3218097     | 6   | 41905275  | 0.91                         | a       | g       | 0.2509          | 0.0675  | 0.0325 | 0.03786   | <i>CCND3</i>     |
| rs9369427         | 6   | 43811430  | rs9472138     | 6   | 43811762  | 0.98                         | t       | c       | 0.2837          | -0.101  | 0.031  | 0.001141  |                  |
| rs9389269         | 6   | 135427159 | rs7776054     | 6   | 135418916 | 0.91                         | a       | g       | 0.7425          | 0.2606  | 0.0321 | 5.05E-16  | <i>HBS1L-MYB</i> |
| rs2075672         | 7   | 100240296 | rs7385804     | 7   | 100235970 | 0.99                         | a       | c       | 0.6298          | -0.0931 | 0.0291 | 0.001349  | <i>TFR2</i>      |
| rs10480300        | 7   | 151406005 | rs10224002    | 7   | 151415041 | 0.86                         | a       | g       | 0.7028          | 0.178   | 0.0308 | 7.66E-09  | <i>PRKAG2</i>    |
| rs4737009         | 8   | 41630405  | rs4737009     | 8   | 41630405  | 1                            | a       | g       | 0.2339          | 0.0781  | 0.0382 | 0.04104   | <i>ANK1</i>      |
| rs579459          | 9   | 136154168 | rs635634      | 9   | 136155000 | 0.83                         | t       | c       | 0.1998          | -0.1856 | 0.0352 | 1.30E-07  | <i>ABO</i>       |
| rs2302264         | 11  | 67207426  | rs1695        | 11  | 67352689  | 0.35                         | a       | g       | 0.6615          | -0.062  | 0.0296 | 0.03625   | <i>GSTP1</i>     |
| rs10849023        | 12  | 4332478   | rs11611647    | 12  | 4333919   | 1                            | t       | c       | 0.7902          | 0.1083  | 0.0344 | 0.001656  |                  |
| rs3184504         | 12  | 111884608 | rs3184504     | 12  | 111884608 | 1                            | t       | c       | 0.4964          | 0.1775  | 0.0282 | 3.13E-10  | <i>SH2B3</i>     |
| rs2271294         | 16  | 67902326  | rs12449157    | 16  | 67708897  | 0.88                         | a       | g       | 0.8435          | -0.0846 | 0.0388 | 0.02923   | <i>GFOD2</i>     |
| rs4969184         | 17  | 76393413  | rs2292642     | 17  | 76395430  | 0.64                         | t       | c       | 0.6096          | -0.0632 | 0.0289 | 0.02896   | <i>PGS1</i>      |
| rs741702          | 19  | 13024250  | rs11085824    | 19  | 13001547  | 0.85                         | a       | g       | 0.6375          | 0.068   | 0.0292 | 0.01998   | <i>GCDH</i>      |
| rs855791          | 22  | 37462936  | rs855791      | 22  | 37462936  | 1                            | a       | g       | 0.4371          | -0.1882 | 0.0285 | 3.81E-11  | <i>TMPRSS6</i>   |
| <b>HEMOGLOBIN</b> |     |           |               |     |           |                              |         |         |                 |         |        |           |                  |
| rs4953318         | 2   | 46355051  | rs10495928    | 2   | 46353166  | 0.8                          | a       | g       | 0.6602          | 0.075   | 0.01   | 5.13E-14  | <i>PRKCE</i>     |
| rs218238          | 4   | 55395024  | rs218237      | 4   | 55394172  | 0.53                         | t       | c       | 0.1295          | -0.048  | 0.0141 | 0.0006523 |                  |
| rs13152701        | 4   | 122751061 | rs1507995     | 4   | 122748308 | 0.31                         | a       | g       | 0.2911          | 0.0769  | 0.0299 | 0.01017   | <i>BBS7</i>      |
| rs1408272         | 6   | 25842951  | rs1408272     | 6   | 25842951  | 1                            | t       | g       | 0.9364          | -0.1474 | 0.0195 | 4.50E-14  | <i>HFE</i>       |
| rs9349204         | 6   | 41914378  | rs3218097     | 6   | 41905275  | 0.91                         | a       | g       | 0.2509          | 0.0242  | 0.0109 | 0.02666   | <i>CCND3</i>     |
| rs9369427         | 6   | 43811430  | rs881858      | 6   | 43806609  | 0.87                         | a       | g       | 0.7011          | 0.0378  | 0.0103 | 0.0002283 |                  |
| rs9389269         | 6   | 135427159 | rs7776054     | 6   | 135418916 | 0.91                         | a       | g       | 0.7423          | 0.0675  | 0.0108 | 4.23E-10  | <i>HBS1L-MYB</i> |
| rs590856          | 6   | 139844429 | rs643381      | 6   | 139839423 | 0.88                         | a       | c       | 0.5218          | -0.0204 | 0.0095 | 0.03157   |                  |
| rs2075672         | 7   | 100240296 | rs7385804     | 7   | 100235970 | 0.99                         | a       | c       | 0.6297          | -0.0196 | 0.0098 | 0.04489   | <i>TFR2</i>      |
| rs10480300        | 7   | 151406005 | rs10224002    | 7   | 151415041 | 0.86                         | a       | g       | 0.7028          | 0.0606  | 0.0104 | 4.98E-09  | <i>PRKAG2</i>    |
| rs579459          | 9   | 136154168 | rs507666      | 9   | 136149399 | 0.83                         | a       | g       | 0.1996          | -0.0732 | 0.0118 | 5.93E-10  | <i>ABO</i>       |
| rs10159477        | 10  | 71099888  | rs7072268     | 10  | 71099913  | 0.10                         | t       | c       | 0.50            | -0.048  | 0.009  | 3.8E-7    | <i>HK1</i>       |
| rs2302264         | 11  | 67207426  | rs2276118     | 11  | 67288594  | 0.75                         | t       | c       | 0.5683          | 0.0198  | 0.0095 | 0.03707   | <i>CABP2</i>     |
| rs10849023        | 12  | 4332478   | rs11611647    | 12  | 4333919   | 1                            | t       | c       | 0.7903          | 0.036   | 0.0116 | 0.001849  |                  |
| rs3184504         | 12  | 111884608 | rs3184504     | 12  | 111884608 | 1                            | t       | c       | 0.4965          | 0.0693  | 0.0095 | 2.74E-13  | <i>SH2B3</i>     |

|                          |    |           |            |    |           |      |   |   |        |         |        |                      |           |
|--------------------------|----|-----------|------------|----|-----------|------|---|---|--------|---------|--------|----------------------|-----------|
| rs2271294                | 16 | 67902326  | rs12449157 | 16 | 67708897  | 0.88 | a | g | 0.8437 | -0.031  | 0.013  | 0.01741              | GFOD2     |
| rs888424                 | 17 | 19985427  | rs2120282  | 17 | 20209474  | 0.59 | t | c | 0.5876 | -0.0215 | 0.0096 | 0.02594              | SPECC1    |
| rs4969184                | 17 | 76393413  | rs2292642  | 17 | 76395430  | 0.64 | t | c | 0.6097 | -0.0274 | 0.0097 | 0.004916             | PGS1      |
| rs732716                 | 19 | 4366219   | rs1127888  | 19 | 4454083   | 0.83 | t | c | 0.2689 | -0.0243 | 0.0107 | 0.02295              | UBXN6     |
| rs855791                 | 22 | 37462936  | rs855791   | 22 | 37462936  | 1    | a | g | 0.4371 | -0.0878 | 0.0096 | 4.27E-20             | TMPRSS6   |
| <b>WHITE BLOOD CELLS</b> |    |           |            |    |           |      |   |   |        |         |        |                      |           |
| rs546829                 | 4  | 74956372  | rs546829   | 4  | 74956372  | 1    | a | t | 0.3819 | 0.0067  | 0.001  | 6.94E-12             | CXCL2     |
| rs2844503                | 6  | 31442731  | rs2844503  | 6  | 31442731  | 1    | a | t | 0.4617 | 0.0063  | 0.001  | 5.63E-10             | HLA       |
| rs445                    | 7  | 92408370  | rs445      | 7  | 92408370  | 1    | t | c | 0.1112 | -0.0094 | 0.0014 | 7.30E-11             | CDK6      |
| rs579459                 | 9  | 136154168 | rs579459   | 9  | 136154168 | 1    | t | c | 0.7706 | 0.0061  | 0.0011 | 1.42E-08             | ABO       |
| rs3184504                | 12 | 111884608 | exm1037423 | 12 | 111884608 | 1    | t | c | 0.4965 | 0.0056  | 0.0009 | 4.26E-10             | SH2B3     |
| rs4794822                | 17 | 38156712  | rs4794822  | 17 | 38156712  | 1    | t | c | 0.3883 | 0.011   | 0.001  | 5.09E-30             | PSMD3     |
| <b>PLATELETS</b>         |    |           |            |    |           |      |   |   |        |         |        |                      |           |
| rs1668871                | 1  | 205237137 | rs1668873  | 1  | 205235990 | 0.94 | a | g | 0.357  | 2.1478  | 0.5356 | 6.06E-05             | TMCC2     |
| rs7550918                | 1  | 247675559 | rs56043070 | 1  | 247719769 | 0.25 | a | g | 0.0721 | -6.7628 | 0.9998 | 1.34E-11             | GCSAML    |
| rs1260326                | 2  | 27730940  | rs780094   | 2  | 27741237  | 0.9  | t | c | 0.415  | 2.2441  | 0.5218 | 1.70E-05             | GCKR      |
| rs17030845               | 2  | 43687879  | rs35720761 | 2  | 43519977  | 0.66 | t | c | 0.1235 | -2.3061 | 0.7815 | 0.00317              | THADA     |
| rs7616006                | 3  | 12267648  | rs1801282  | 3  | 12393125  | 0.07 | c | g | 0.88   | -3.878  | 0.801  | 1.3x10 <sup>-6</sup> | PPARG     |
| rs1354034                | 3  | 56849749  | rs12485738 | 3  | 56865776  | 0.69 | a | g | 0.3805 | -4.8268 | 0.527  | 5.28E-20             | ARHGEF3   |
| rs17568628               | 5  | 76046939  | rs34592828 | 5  | 75996909  | 0.94 | a | g | 0.0383 | -6.5492 | 1.3427 | 1.08E-06             | IQGAP2    |
| rs2070729                | 5  | 131819921 | rs2188962  | 5  | 131770805 | 0.29 | t | c | 0.421  | -1.4387 | 0.521  | 0.005754             | C5orf56   |
| rs441460                 | 6  | 25548288  | rs742132   | 6  | 25607571  | 0.54 | a | g | 0.7008 | 1.7683  | 0.567  | 0.001815             | LRRCL16A  |
| rs3819299                | 6  | 31322367  | rs3819299  | 6  | 31322367  | 1    | t | g | 0.9436 | -5.2144 | 1.1219 | 3.35E-06             | HLA-B     |
| rs399604                 | 6  | 32975014  | rs399604   | 6  | 32975014  | 1    | t | c | 0.5769 | -2.2387 | 0.5226 | 1.84E-05             | HLA-DOA   |
| rs210134                 | 6  | 33540209  | rs210139   | 6  | 33543409  | 0.25 | a | c | 0.6099 | -4.4329 | 0.528  | 4.66E-17             | BAK1      |
| rs9399137                | 6  | 135419018 | rs4895441  | 6  | 135426573 | 0.91 | a | g | 0.7345 | -5.5051 | 0.5818 | 2.99E-21             | HBS1L-MYB |
| rs342275                 | 7  | 106359216 | rs342293   | 7  | 106372219 | 0.95 | c | g | 0.5473 | 3.5766  | 0.5151 | 3.83E-12             |           |
| rs6993770                | 8  | 106581528 | rs2343596  | 8  | 106593207 | 0.73 | a | c | 0.3145 | -2.8276 | 0.5549 | 3.47E-07             | ZFPM2     |
| rs6995402                | 8  | 145005561 | rs11136344 | 8  | 145059425 | 0.22 | t | c | 0.5673 | -2.2594 | 0.5156 | 1.18E-05             | PARP10    |
| rs409801                 | 9  | 4744743   | rs385893   | 9  | 4763176   | 0.46 | t | c | 0.4913 | -5.3356 | 0.5128 | 2.36E-25             |           |
| rs13300663               | 9  | 4814948   | rs10758658 | 9  | 4856877   | 0.52 | a | g | 0.1861 | 4.5309  | 0.6601 | 6.71E-12             | RCL1      |
| rs10761731               | 10 | 65027610  | rs12355784 | 10 | 65121565  | 0.8  | a | c | 0.4893 | 3.7401  | 0.5149 | 3.75E-13             | JMJD1C    |
| rs505404                 | 11 | 243268    | rs11602954 | 11 | 202856    | 0.95 | a | g | 0.2078 | 4.9545  | 0.6359 | 6.66E-15             | BET1L     |
| rs4246215                | 11 | 61564299  | rs174546   | 11 | 61569830  | 0.9  | t | c | 0.3338 | 1.7442  | 0.5445 | 0.001359             | FADS1     |
| rs4938642                | 11 | 119099906 | rs2239896  | 11 | 118983434 | 0.57 | t | c | 0.0574 | 4.0048  | 1.1123 | 0.0003177            | C2CD2L    |
| rs941207                 | 12 | 57023284  | rs2958154  | 12 | 57065713  | 0.62 | t | c | 0.6533 | -1.329  | 0.5384 | 0.01357              | PTGES3    |
| rs3184504                | 12 | 111884608 | rs3184504  | 12 | 111884608 | 1    | t | c | 0.4952 | 4.5008  | 0.5154 | 2.49E-18             | SH2B3     |
| rs17824620               | 12 | 113100994 | rs233716   | 12 | 113039943 | 0.26 | t | c | 0.5793 | -2.5585 | 0.5259 | 1.15E-06             |           |
| rs7961894                | 12 | 122365583 | rs7961894  | 12 | 122365583 | 1    | t | c | 0.1088 | -4.5736 | 0.8213 | 2.56E-08             | WDR66     |
| rs7149242                | 14 | 101159416 | rs12883126 | 14 | 101134008 | 0.32 | t | c | 0.769  | 1.2747  | 0.6098 | 0.03658              | LINC00523 |
| rs2297067                | 14 | 103566785 | rs2297067  | 14 | 103566785 | 1    | t | c | 0.2455 | 1.7078  | 0.5977 | 0.004273             | EXOC3L4   |
| rs6065                   | 17 | 4836381   | rs6065     | 17 | 4836381   | 1    | t | c | 0.0838 | 3.3587  | 0.9335 | 0.0003205            | GP1BA     |
| rs397969                 | 17 | 19804247  | rs203462   | 17 | 19812541  | 0.99 | t | c | 0.6196 | -1.2437 | 0.5271 | 0.01831              | AKAP10    |
| rs559972                 | 17 | 27814496  | rs2138852  | 17 | 27703349  | 0.98 | t | c | 0.521  | -3.2703 | 0.5096 | 1.38E-10             |           |
| rs10512472               | 17 | 33884804  | rs10512472 | 17 | 33884804  | 1    | t | c | 0.818  | -3.2465 | 0.6698 | 1.25E-06             | SLFN14    |
| rs11082304               | 18 | 20720973  | rs11082304 | 18 | 20720973  | 1    | t | g | 0.5018 | -3.4896 | 0.5124 | 9.78E-12             | CABLES1   |
| rs4812048                | 20 | 55587771  | rs6070697  | 20 | 57599402  | 1    | a | g | 0.1767 | 2.0876  | 0.6746 | 0.001969             | TUBB1     |

**Supplementary Table 4.** Gene-based association results. We analyzed association between rare non-synonymous (missense, nonsense) and splice site variants and blood cell traits using the Burden T1 and SKAT gene-based tests. Markers with minor allele frequency <1% and <5% were considered for the Burden T1 and SKAT tests, respectively. We selected from the MHI+WHI analysis 19 genes with  $P < 1 \times 10^{-4}$  and attempted to replicate them in SHIP.

| Phenotype | Test   | Gene           | Complete list of variants                                                                                                                                                                                                                                               | MHI+WHI            |                      | SHIP               |                      | MHI+WHI+SHIP       |                       |
|-----------|--------|----------------|-------------------------------------------------------------------------------------------------------------------------------------------------------------------------------------------------------------------------------------------------------------------------|--------------------|----------------------|--------------------|----------------------|--------------------|-----------------------|
|           |        |                |                                                                                                                                                                                                                                                                         | Number of variants | P                    | Number of variants | P                    | Number of variants | P                     |
| HCT       | Burden | <i>C7orf72</i> | rs182523159,chr7:50143943,rs149326344,rs61754912                                                                                                                                                                                                                        | 4                  | 2.32E-05             | 3                  | 0.91                 | 4                  | 1.1E-4                |
| HCT       | SKAT   | <i>EPO</i>     | rs62483572, rs137953994, rs11976235, rs149431976, rs73409075                                                                                                                                                                                                            | 5                  | 4.6x10 <sup>-5</sup> | 4                  | 0.033                | 5                  | 1.4x10 <sup>-6</sup>  |
| HCT       | SKAT   | <i>SLC35B3</i> | rs184068804,rs143437815,rs190725185,rs143539087,rs141256356,rs138204292,rs34956976,rs142783777                                                                                                                                                                          | 8                  | 8.41E-05             | 5                  | 0.84                 | 8                  | 0.0033                |
| HCT       | SKAT   | <i>TUBGCP4</i> | chr15:43668300,chr15:43668384,rs188822226,rs191224065,chr15:43678503,rs183013671,chr15:43693969,chr15:43693987                                                                                                                                                          | 8                  | 8.53E-05             | 4                  | 0.61                 | 8                  | 0.0029                |
| HCT       | SKAT   | <i>RUFY3</i>   | chr4:71634272,rs182772740,chr4:71639274,rs140962303,chr4:71659504,rs149107016,chr4:71659621,chr4:71665919,chr4:71672317,rs114009356                                                                                                                                     | 9                  | 9.91E-05             | 8                  | 1                    | 10                 | 0.024                 |
| HGB       | Burden | <i>HBB</i>     | rs33946267, rs33947415, rs1135071, rs33971440, rs33974228                                                                                                                                                                                                               | 4                  | 9.2x10 <sup>-5</sup> | 2                  | 0.23                 | 5                  | 4.3x10 <sup>-5</sup>  |
| HGB       | Burden | <i>SAMD9L</i>  | chr7:92760773,rs139478067,chr7:92761203,rs141306896,chr7:92762757,chr7:92762855,rs147903234,chr7:92763351,rs73710963,rs142436298,rs143593856,chr7:92763736,rs140536419,rs150070697,rs151204118,rs141294380,chr7:92764714,rs144605831,rs149275726,rs148147724,rs60838691 | 17                 | 5.33E-05             | 13                 | 0.92                 | 21                 | 0.0036                |
| HGB       | SKAT   | <i>EPO</i>     | rs62483572, rs137953994, rs11976235, rs149431976, rs73409075                                                                                                                                                                                                            | 5                  | 7.8x10 <sup>-5</sup> | 4                  | 0.072                | 5                  | 4.0x10 <sup>-6</sup>  |
| HGB       | SKAT   | <i>RUFY3</i>   | chr4:71634272,rs182772740,chr4:71639274,rs140962303,chr4:71659504,rs149107016,chr4:71659621,chr4:71665919,chr4:71672317,rs114009356                                                                                                                                     | 9                  | 3.86E-05             | 8                  | 0.96                 | 10                 | 0.022                 |
| HGB       | SKAT   | <i>ADAP1</i>   | rs145174713,chr7:944803,rs147172089,rs139497517,rs145788459,rs141244581                                                                                                                                                                                                 | 5                  | 6.92E-05             | 4                  | 0.22                 | 6                  | 5.72E-05              |
| HGB       | SKAT   | <i>TUBGCP4</i> | chr15:43668300,chr15:43668384,rs188822226,rs191224065,chr15:43678503,rs183013671,chr15:43693969,chr15:43693987                                                                                                                                                          | 8                  | 9.28E-05             | 4                  | 0.45                 | 8                  | 0.012                 |
| WBC       | Burden | <i>CXCR2</i>   | rs139809702, rs75759064, rs55799208, rs10201766, rs61733609, rs200726461, rs2228413, rs199632317                                                                                                                                                                        | 8                  | 1.6x10 <sup>-6</sup> | 6                  | 8.3x10 <sup>-9</sup> | 8                  | 2.6x10 <sup>-13</sup> |
| WBC       | Burden | <i>S1PR4</i>   | rs150230356,rs147876709,rs3826936,rs3746072,chr19:3179931                                                                                                                                                                                                               | 5                  | 2.76E-06             | 5                  | 0.20                 | 5                  | 0.013                 |
| WBC       | Burden | <i>RANGAP1</i> | chr22:41647049,rs139571477,rs114673061,rs143560227,rs143866878,chr22:41660673,rs116510625                                                                                                                                                                               | 7                  | 2.72E-05             | 5                  | 0.95                 | 7                  | 0.0010                |
| WBC       | Burden | <i>IGFL1</i>   | rs147938784,chr19:46733532,rs187146043,rs190483911                                                                                                                                                                                                                      | 4                  | 5.17E-05             | 2                  | 0.30                 | 4                  | 0.0018                |
| WBC       | SKAT   | <i>KRT35</i>   | chr17:39635117,chr17:39635169,rs143386151,rs192328036,rs185963879,chr17:39636962,chr17:39636983,chr17:39637145,rs139838007,chr17:39637271,chr17:39637328                                                                                                                | 11                 | 2.33E-05             | 9                  | 0.67                 | 11                 | 4.3E-04               |
| WBC       | SKAT   | <i>S1PR4</i>   | rs150230356,rs147876709,rs3826936,rs3746072,chr19:3179931                                                                                                                                                                                                               | 5                  | 3.94E-05             | 5                  | 0.14                 | 5                  | 0.016                 |
| WBC       | SKAT   | <i>MFAP5</i>   | rs148770543,rs139330366                                                                                                                                                                                                                                                 | 2                  | 8.80E-05             | 2                  | 0.57                 | 2                  | 8.89E-05              |
| PLT       | Burden | <i>RBM46</i>   | chr4:155719287,rs139756307,rs145321511,chr4:155720617,rs141427057,chr4:155749134,rs147971341                                                                                                                                                                            | 6                  | 2.75E-05             | 5                  | 0.57                 | 7                  | 4.8E-04               |
| PLT       | Burden | <i>FZD3</i>    | rs140115204,rs139570173,chr8:28413272,rs146950723,rs147574227                                                                                                                                                                                                           | 5                  | 8.55E-05             | 2                  | 0.84                 | 5                  | 3.2E-04               |
| PLT       | SKAT   | <i>SH2B3</i>   | rs183913232, rs147341899, rs149554298, rs140042617, rs147318193, rs148636776, rs181879167, rs72650673, rs200907236, rs200567433, rs74163669, rs200089302, rs140649197, rs72650662, rs148791142, rs199803113                                                             | 14                 | 2.2x10 <sup>-7</sup> | 8                  | 2.9x10 <sup>-4</sup> | 14                 | 6.7x10 <sup>-10</sup> |
| PLT       | SKAT   | <i>TUBB1</i>   | rs145280665, rs144337011, rs415064, rs150551805, rs41303899, rs200931731, rs202177647, rs146846923, rs62639975, rs192115302, rs62639974, rs115253190, chr20:57599645, rs138642232                                                                                       | 13                 | 2.2x10 <sup>-5</sup> | 8                  | 2.9x10 <sup>-4</sup> | 14                 | 6.7x10 <sup>-10</sup> |
| PLT       | SKAT   | <i>CTSC</i>    | rs3888798,rs146182103,chr11:88027277,chr11:88027365,rs142378484                                                                                                                                                                                                         | 5                  | 2.70E-05             | 1                  | 0.61                 | 5                  | 3.55E-06              |



**Supplementary Table 5.** Clinical characteristics of 19 participants from the MHI Biobank and WHI study that carry *JAK2* p.Val617Phe alleles based on whole blood DNA genotyped on the exome array.

| ID | Baseline       |                   |                               |                                       | Year 3 (follow-up) |                   |                               |                                       | Coronary heart disease | Stroke | Leukemia | Cause of death    | Number of <i>JAK2</i> p.Val617Phe alleles |
|----|----------------|-------------------|-------------------------------|---------------------------------------|--------------------|-------------------|-------------------------------|---------------------------------------|------------------------|--------|----------|-------------------|-------------------------------------------|
|    | Hematocrit (%) | Hemoglobin (g/dl) | Platelet (10 <sup>9</sup> /l) | White blood cell (10 <sup>9</sup> /l) | Hematocrit (%)     | Hemoglobin (g/dl) | Platelet (10 <sup>9</sup> /l) | White blood cell (10 <sup>9</sup> /l) |                        |        |          |                   |                                           |
| 1  | 46             | 15.9              | 658                           | 9                                     | 50.6               | 16.8              | 662                           | 12.7                                  | No                     | No     | No       | NA                | 1                                         |
| 2  | 40             | 12.5              | 502                           | 5.9                                   | NA                 | NA                | NA                            | NA                                    | No                     | Yes    | No       | Other Cancer      | 1                                         |
| 3  | 46             | 13                | 796                           | 23.4                                  | 54                 | 15.4              | 647                           | 67.5                                  | No                     | Yes    | No       | Cerebrovascular   | 2                                         |
| 4  | 40.7           | 12.9              | 482                           | 10.7                                  | NA                 | NA                | NA                            | NA                                    | No                     | Yes    | Yes      | NA                | 1                                         |
| 5  | 41.1           | 14                | 437                           | 3.9                                   | NA                 | NA                | NA                            | NA                                    | Yes                    | Yes    | No       | NA                | 1                                         |
| 6  | 46.6           | 16.1              | 310                           | 8.3                                   | 47.2               | 15.4              | 259                           | 11.5                                  | No                     | Yes    | No       | NA                | 1                                         |
| 7  | 48             | 15.9              | 357                           | 6.9                                   | NA                 | NA                | NA                            | NA                                    | No                     | No     | No       | NA                | 1                                         |
| 8  | 45.4           | 14.8              | 411                           | 8.6                                   | NA                 | NA                | NA                            | NA                                    | Yes                    | No     | No       | Other Known Cause | 1                                         |
| 9  | 39.9           | 13.5              | 227                           | 5.4                                   | NA                 | NA                | NA                            | NA                                    | No                     | Yes    | No       | NA                | 1                                         |
| 10 | 43.8           | 14.8              | 365                           | 5.8                                   | NA                 | NA                | NA                            | NA                                    | Yes                    | No     | No       | NA                | 1                                         |
| 11 | 42.5           | 14.7              | 279                           | 5.8                                   | NA                 | NA                | NA                            | NA                                    | Yes                    | No     | No       | NA                | 1                                         |
| 12 | 49.5           | 16.5              | 529                           | 7.3                                   | NA                 | NA                | NA                            | NA                                    | No                     | No     | No       | NA                | 1                                         |
| 13 | 42.5           | 14.2              | 411                           | 7                                     | NA                 | NA                | NA                            | NA                                    | No                     | No     | No       | NA                | 1                                         |
| 14 | 49.3           | 16.7              | 266                           | 9.1                                   | NA                 | NA                | NA                            | NA                                    | No                     | No     | No       | NA                | 1                                         |
| 15 | 49.4           | 16.4              | 697                           | 8                                     | NA                 | NA                | NA                            | NA                                    | Yes                    | No     | No       | NA                | 1                                         |
| 16 | 45.1           | 14.2              | 412                           | 9.5                                   | NA                 | NA                | NA                            | NA                                    | No                     | Yes    | No       | NA                | 1                                         |
| 17 | 37.5           | 13.1              | 239                           | 11.4                                  | NA                 | NA                | NA                            | NA                                    | Yes                    | No     | No       | NA                | 1                                         |
| 18 | 42.9           | 14.4              | 201                           | 11.7                                  | NA                 | NA                | NA                            | NA                                    | Yes                    | Yes    | No       | NA                | 1                                         |
| 19 | 42.3           | 14.6              | 291                           | 14.5                                  | NA                 | NA                | NA                            | NA                                    | Yes                    | No     | No       | NA                | 1                                         |

**Supplementary Table 6.** Missense variants in *CXCR2* and white blood cell count. For each variant by study, we list allele count and frequency, white blood cell mean (s.d.) and association P-value using the score test implemented in raremetal (see above). The mean (s.d.) white blood cell count in each study is ( $\times 10^9/l$ ): MHI 7.1 (2.2), WHI 6.1 (1.7), SHIP 6.4 (1.8).

| <i>CXCR2</i> variant  | MHI (N=6,796)           |                      |                         | WHI (N=18,018)          |                      |                         | SHIP (N=6,526)          |                      |                         | Association P-value  |
|-----------------------|-------------------------|----------------------|-------------------------|-------------------------|----------------------|-------------------------|-------------------------|----------------------|-------------------------|----------------------|
|                       | Allele count (het/homo) | Allele frequency     | WBC ( $\times 10^9/l$ ) | Allele count (het/homo) | Allele frequency     | WBC ( $\times 10^9/l$ ) | Allele count (het/homo) | Allele frequency     | WBC ( $\times 10^9/l$ ) |                      |
| rs139809702 (p.M6R)   | Monomorphic             |                      |                         | 1 (1/0)                 | $2.8 \times 10^{-5}$ | 6.2 (NA)                | Monomorphic             |                      |                         | 0.91                 |
| rs75759064 (p.A37T)   | 2 (2/0)                 | $1.5 \times 10^{-4}$ | 6.6 (1.7)               | 5 (5/0)                 | $1.4 \times 10^{-4}$ | 6.3 (1.4)               | 3 (3/0)                 | $2.3 \times 10^{-4}$ | 6.3 (1.2)               | 0.63                 |
| rs55799208 (p.R153H)  | 28 (28/0)               | 0.0021               | 6.4 (1.5)               | 99 (99/0)               | 0.0027               | 5.6 (1.8)               | 50 (50/0)               | 0.0038               | 5.7 (1.7)               | $2.5 \times 10^{-6}$ |
| rs10201766 (p.R236C)  | 7 (7/0)                 | $5.2 \times 10^{-4}$ | 7.3 (1.6)               | 58 (58/0)               | 0.0016               | 5.8 (1.5)               | 66 (66/0)               | 0.0051               | 5.9 (1.7)               | 0.0036               |
| rs61733609 (p.R248Q)  | 26 (26/0)               | 0.0019               | 6.3 (1.3)               | 47 (47/0)               | 0.0013               | 5.3 (1.4)               | 51 (51/0)               | 0.0039               | 5.4 (1.6)               | $2.2 \times 10^{-9}$ |
| rs200726461 (p.R289C) | Monomorphic             |                      |                         | 7 (7/0)                 | $1.9 \times 10^{-4}$ | 6.2 (0.8)               | 2 (2/0)                 | $1.5 \times 10^{-4}$ | 5.1 (1.6)               | 0.95                 |
| rs2228413 (p.R294Q)   | 24 (22/1)               | 0.0017               | 7.0 (2.1)               | 4 (4/0)                 | $1.1 \times 10^{-4}$ | 5.8 (1.9)               | 2 (2/0)                 | $1.5 \times 10^{-4}$ | 6.4 (0.7)               | 0.87                 |
| rs199632317 (p.H332R) | Monomorphic             |                      |                         | 3 (3/0)                 | $8.3 \times 10^{-5}$ | 5.0 (2.1)               | Monomorphic             |                      |                         | 0.15                 |

**Supplementary Table 7.** Association of *CXCR2* missense variants with white blood cell subtypes in the MHI Biobank (N=6,796) and a subset of SHIP (N=3,438). WBC subtypes are not available for WHI. We present burden T1 results for the *CXCR2* missense variants listed in **Table 2** of the main text (rs139809702, rs75759064, rs55799208, rs10201766, rs61733609, rs200726461, rs2228413, rs199632317). The effect size is calculated using a meta-analysis of the single variant results and the direction of the effect is for the rare alleles. For basophils and eosinophils, the units are standard deviations of counts. For lymphocytes, monocytes and neutrophils, the units are  $\log_{10}(x10^9/l)$ .

| Phenotype   | MHI Burden T1 |                 | SHIP Burden T1 <i>P</i> -value |                      |
|-------------|---------------|-----------------|--------------------------------|----------------------|
|             | Effect size   | <i>P</i> -value | Effect size                    | <i>P</i> -value      |
| Basophils   | 0.004         | 0.97            | -0.268                         | 0.012                |
| Eosinophils | -0.165        | 0.12            | -0.204                         | 0.056                |
| Lymphocytes | 0.526         | 0.44            | -1.533                         | 0.061                |
| Monocytes   | -1.222        | 0.087           | -3.490                         | $1.2 \times 10^{-5}$ |
| Neutrophils | -1.697        | 0.013           | -3.493                         | $6.7 \times 10^{-7}$ |

## SUPPLEMENTARY NOTE

### Coding variants associated with hematological traits identified by GWAS or within candidate genes

The single variant meta-analyses of association results for MHI and WHI confirmed many single nucleotide polymorphisms (SNPs) previously associated with blood cell traits by GWAS (**Supplementary Fig. 1** and **Supplementary Table 3**). Although most GWAS SNPs are non-coding, we found three examples where a coding or splice site variant in linkage disequilibrium (LD) with a sentinel SNP could explain a platelet GWAS signal: a 5' donor splice variant in *GCSAML* (rs56043070, minor allele frequency (MAF)=7%,  $P=1.3 \times 10^{-11}$ ), a missense variant in *TUBB1* (rs6070697, p.Arg307His, MAF=18%,  $P=0.002$ ), and the *PPARG* p.Pro12Ala missense variant also associated with type 2 diabetes (rs1801282, MAF=12%,  $P=1.3 \times 10^{-6}$ ) (**Supplementary Table 3**). Mutations in *TUBB1* (which encodes a megakaryocyte lineage-specific isoform of beta-tubulin) are linked to low platelet counts in mouse models, and cause autosomal dominant macrothrombocytopenia in humans (MIM 612901) and Cavalier King Charles Spaniel dogs<sup>8</sup>. *PPARG* is highly expressed in platelets<sup>9</sup> and thiazolidinediones, PPAR $\gamma$  agonists that are used to treat type 2 diabetes, also improve platelet function and coagulation<sup>10,11</sup>.

To identify coding variants associated with blood cell traits that lie outside of known GWAS loci, we selected 42 markers with  $P < 1 \times 10^{-5}$  (along with  $P < 1 \times 10^{-4}$  for coding variants in *PKLR*, *BUB1B* and *TUBB1*, three strong candidate genes) in the MHI+WHI discovery sample for validation in SHIP (**Supplementary Table 2**). We identified six new genetic associations with hematocrit, hemoglobin and platelet traits that met our predetermined statistical threshold of  $P < 6.8 \times 10^{-8}$  (discussed in the main text). There are also several coding variants in strong candidate genes that did not reach our stringent statistical threshold (**Supplementary Table 2**). This includes a rare missense variant in *PKLR* (rs61755431, p.Arg538Gln or p.Arg569Gln, MAF=0.3%) associated with hematocrit ( $P=2.3 \times 10^{-5}$ ) and hemoglobin ( $P=1.1 \times 10^{-6}$ ) levels. *PKLR* encodes a pyruvate kinase present in red blood cells and rare familial mutations in this gene cause hemolytic anemia (MIM 609712). We found an association between a common missense variant (rs1260326, p.Leu446Pro, MAF=43%) in the glucokinase regulator (*GCKR*) gene and WBC count ( $P=8.5 \times 10^{-8}$ ): although the same SNP has been associated with many human traits by GWAS, including metabolic<sup>12</sup>, lipid<sup>13</sup> and platelet<sup>7</sup> traits, this is the first report of an association with WBC.

We can increase power to find associations between complex traits and rare variants by combining them into functional units (*e.g.* genes)<sup>14</sup>. We used two tests to detect association between rare/low-frequency variants and hematological traits: a burden (T1) test and the sequence kernel association test (SKAT), and a  $P < 3.9 \times 10^{-7}$  threshold to declare significance. We only considered nonsense, missense and splice site variants, and used a minor allele frequency inclusion cutoff of 1% and 5% for the T1 test and SKAT, respectively. Using this strategy, we prioritized from the MHI+WHI meta-analysis 23 gene-phenotype pairs for replication in SHIP (**Supplementary Table 4** and **Supplementary Figs. 2-3**). Of the top five genes, four were already highlighted by our analysis of rare/low-

frequency variants (*EPO*, *HBB*, *SH2B3* and *TUBB1*) and when we excluded the top associated rare/low-frequency variant, the gene-based signal disappeared (**Table 2**).

## References

1. Syed, R.S. *et al.* Efficiency of signalling through cytokine receptors depends critically on receptor orientation. *Nature* **395**, 511-6 (1998).
2. Hu, J. & Hubbard, S.R. Structural basis for phosphotyrosine recognition by the Src homology-2 domains of the adapter proteins SH2-B and APS. *J Mol Biol* **361**, 69-79 (2006).
3. Park, S.H. *et al.* Structure of the chemokine receptor CXCR1 in phospholipid bilayers. *Nature* **491**, 779-83 (2012).
4. Fan, G.H., Yang, W., Wang, X.J., Qian, Q. & Richmond, A. Identification of a motif in the carboxyl terminus of CXCR2 that is involved in adaptin 2 binding and receptor internalization. *Biochemistry* **40**, 791-800 (2001).
5. Goldstein, J.I. *et al.* zCall: a rare variant caller for array-based genotyping: genetics and population analysis. *Bioinformatics* **28**, 2543-5 (2012).
6. Yang, J., Lee, S.H., Goddard, M.E. & Visscher, P.M. GCTA: a tool for genome-wide complex trait analysis. *Am J Hum Genet* **88**, 76-82 (2011).
7. Yang, J., Lee, S.H., Goddard, M.E. & Visscher, P.M. Genome-wide complex trait analysis (GCTA): methods, data analyses, and interpretations. *Methods Mol Biol* **1019**, 215-36 (2013).
8. Forand, A. *et al.* EKLF-driven PIT1 expression is critical for mouse erythroid maturation in vivo and in vitro. *Blood* **121**, 666-78 (2013).
9. Wu, C. *et al.* BioGPS: an extensible and customizable portal for querying and organizing gene annotation resources. *Genome Biol* **10**, R130 (2009).
10. van der Harst, P. *et al.* Seventy-five genetic loci influencing the human red blood cell. *Nature* **492**, 369-75 (2012).
11. Thurman, R.E. *et al.* The accessible chromatin landscape of the human genome. *Nature* **489**, 75-82 (2012).
12. Du, P. *et al.* Comparison of Beta-value and M-value methods for quantifying methylation levels by microarray analysis. *BMC Bioinformatics* **11**, 587 (2010).
13. Teslovich, T.M. *et al.* Biological, clinical and population relevance of 95 loci for blood lipids. *Nature* **466**, 707-13 (2010).
14. Bansal, V., Libiger, O., Torkamani, A. & Schork, N.J. Statistical analysis strategies for association studies involving rare variants. *Nat Rev Genet* **11**, 773-85 (2010).
